# Supplementary material for: Economic consequences of ill-health for households in northern rural India
Source: PubMed Central journal article supplement (PMC4419476; doi:10.1186/s12913-015-0833-0), 2015-04-26
Supplement: 12913_2015_833_MOESM1_ESM.pdf [file 12913_2015_833_MOESM1_ESM.pdf]

| 10.6 COPING WITH FALLS IN INCOME AND LARGE EXPENSES, LAST 12 MONTHS                                                                          |                                                                    |                                                                                  |                                                                                   |                                                                                                               |                                                                                                                                |                   |                   |
|----------------------------------------------------------------------------------------------------------------------------------------------|--------------------------------------------------------------------|----------------------------------------------------------------------------------|-----------------------------------------------------------------------------------|---------------------------------------------------------------------------------------------------------------|--------------------------------------------------------------------------------------------------------------------------------|-------------------|-------------------|
| <b>[Read Out:]</b> I want to ask you about a list of adverse events that your household might have experienced, and how you coped with them. |                                                                    |                                                                                  |                                                                                   |                                                                                                               |                                                                                                                                |                   |                   |
|                                                                                                                                              | 10.6.1 How many times did this event happen in the last 12 months? | 10.6.2 In the last 12 months, how severely did this event affect your household? | 10.6.3 How much has your household recovered from the consequences of this event? | 10.6.4 What was the total value lost due to this event regarding income, expenditures and assets (incl land)? | 10.6.5 In order, what were the three most important things you did to cope with the financial problems this event caused? Code |                   |                   |
|                                                                                                                                              | <i>If never, write 0</i>                                           | Code                                                                             | Code                                                                              | Rs.                                                                                                           | 1 <sup>st</sup> .                                                                                                              | 2 <sup>nd</sup> . | 3 <sup>rd</sup> . |
| A. Natural Disaster (Drought / Flood / etc.)                                                                                                 |                                                                    |                                                                                  |                                                                                   |                                                                                                               |                                                                                                                                |                   |                   |
| B. Storage, Crop or Livestock disease / pest                                                                                                 |                                                                    |                                                                                  |                                                                                   |                                                                                                               |                                                                                                                                |                   |                   |
| C. Job Loss / No salary                                                                                                                      |                                                                    |                                                                                  |                                                                                   |                                                                                                               |                                                                                                                                |                   |                   |
| D. Drop in sale prices of agricultural produce                                                                                               |                                                                    |                                                                                  |                                                                                   |                                                                                                               |                                                                                                                                |                   |                   |
| E. Increase in agricultural input prices                                                                                                     |                                                                    |                                                                                  |                                                                                   |                                                                                                               |                                                                                                                                |                   |                   |
| F. Communal / Political / Religious / Tribal conflict/ Crime                                                                                 |                                                                    |                                                                                  |                                                                                   |                                                                                                               |                                                                                                                                |                   |                   |
| G. Wedding                                                                                                                                   |                                                                    |                                                                                  |                                                                                   |                                                                                                               |                                                                                                                                |                   |                   |
| H. Illness or death of household member                                                                                                      |                                                                    |                                                                                  |                                                                                   |                                                                                                               |                                                                                                                                |                   |                   |

Code box for Question 10.6.2

No Impact.....1  
 Low.....2  
 Medium.....3  
 High.....4  
 Extreme.....5

Code box for Question 10.6.3

Completely.....1  
 Mostly.....2  
 Somewhat.....3  
 A little.....4  
 Not at all.....5

Code box for Question 10.6.5

Do nothing.....1  
 Spend savings.....2  
 Use insurance.....3  
 Sell animals/ farm land/ assets.....4  
 Work more hours.....5  
 Send children to relatives or friends.....6  
 Send children to work.....7  
 Ask for gifts/ assistance/ loans from relatives and friends.....8  
 Borrow money from money lender.....9  
 Borrow money from Bank /SHG.....10  
 Seek religious / spiritual help.....11  
 Get help from NGO.....12  
 Buy less food.....13  
 Reduce non-food expenses.....14  
 Other.....98 (please specify)

Appendix 1: Retrospective household shocks module included in the survey.
